# Supplementary material for: Lake anoxia, primary production, and algal community shifts in response to rapid climate changes during the Late Glacial
Source: Copernicus journal article supplement (doi:10.5194/bg-22-3821-2025), 2025-08-07
Supplement: Supplementary file 1 [file bg-22-3821-2025-supplement.pdf]

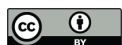

*Supplement of*

## **Lake anoxia, primary production, and algal community shifts in response to rapid climate changes during the Late Glacial**

**Stan J. Schouten et al.**

*Correspondence to:* Stan J. Schouten ([stan.schouten@unibe.ch](mailto:stan.schouten@unibe.ch))

The copyright of individual parts of the supplement might differ from the article licence.

## S1: HPLC analysis and chromatogram evaluation

### Settings for HPLC analysis

We deployed two mobile phases; Mobile-phase A: volumetric ratio of 2:8, milliQ:methanol with ion-pairing (0.001 M tetrabutyl ammonium phosphate and 0.001 M propionic acid) and Mobile phase B: volumetric ratio of 6:4, acetone:methanol. The HPLC protocol follows Lami et al. (2000). We injected 100 µl of pigment extract into a mobile phase A and ramped in the first 30 min from 85% mobile-phase A to 100% mobile-phase B. Next, 100% mobile-phase B was maintained for 20 min. The respective flow rate gradient during these two phases, changes from 1 ml min<sup>-1</sup> to 2 ml min<sup>-1</sup>. At the end of the 50-minute run, the column was rinsed for 15 min by linear ramping back to 85% mobile-phase A within 5 min and maintaining this for 10 min (Lami et al., 2000).

### Chromatogram evaluation and error calculation

Baseline chromatograms of two samples from the composite core (located at 14.36 ka BP and 15.85 ka BP) are displayed below. The Full Chemical Error (FCE) was calculated as the mean absolute error (MAE) of 5 random full chemical duplicate samples (separate samples at the same depth; *original* =  $S_i$ ; *duplicate* =  $D_i$ ). When the FCE expressed as a percentage of the downcore range (max value in timeseries  $S$  – min value) was >35% the pigment timeseries were excluded.  $FCE = \frac{\sum_{i=1}^5 \sqrt{(S_i - D_i)^2} / 5}{\max(S) - \min(S)} \cdot 100\%$

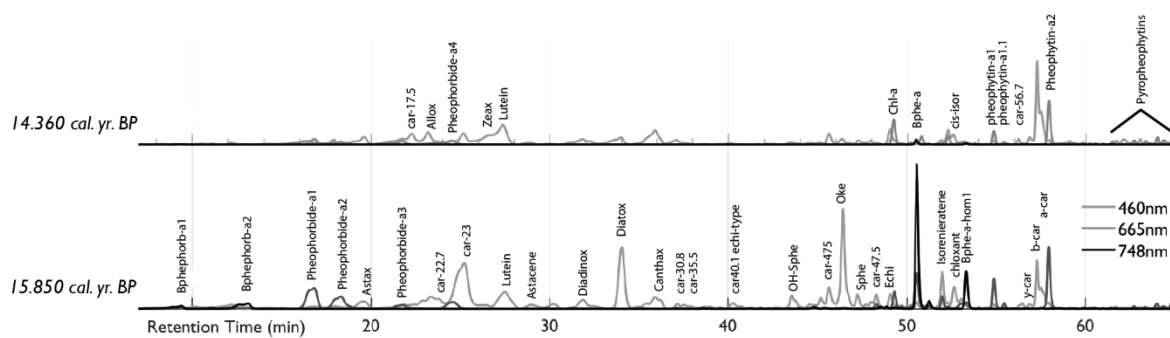

**Table S1:**  $^{14}\text{C}$  dates, tephra and biostratigraphic markers used for the age-depth model presented in Fig. 2 of the main text. One sample (BE-20927) was lost during target pressing. The sample BE-20934.1.1 (*Pinus sp.* periderm) was excluded because it is too young (10.9 ka BP) relative to its stratigraphic position (ca. 16.7 ka BP).

| Lab Code     | Master depth (cm) | $^{14}\text{C}$ Age uncal. (y BP) | $\pm 1\sigma$ (y) | Calibrated Age Intcal20 (cal. BP) | $\pm 1\sigma$ | Mean modelled age | $\pm$  | Measurement | Macrofossil                                                                                                                                                                                                          | Weight (dry) | Comment                     |
|--------------|-------------------|-----------------------------------|-------------------|-----------------------------------|---------------|-------------------|--------|-------------|----------------------------------------------------------------------------------------------------------------------------------------------------------------------------------------------------------------------|--------------|-----------------------------|
| BE-20926.1.1 | 487.7             | 9362                              | 105               | 10580                             | 10409-10733   | 10642             | 307    | gas         | 5 c.f. wood fragments, thin, rather soft (8 mm <sup>2</sup> ),                                                                                                                                                       | 0.2 mg       |                             |
| BE-20927     | 495.6             | -                                 | -                 | -                                 | -             | 10992             | 342.5  | graphite    | 3 <i>Pinus sp.</i> periderm fragments (15 mm <sup>2</sup> ); conif. scale, <i>Quercus sp.</i> Budscale; deciduous twig; small dicot leaf fragments; <i>Betula alba</i> fruit, <i>Betula alba</i> (woody fruit scale) | 0.8 mg       | lost during target pressing |
| BE-20928.1.1 | 504.8             | 10005                             | 56                | 11839                             | 11330-11685   | 11599             | 227.5  | graphite    | <i>Pinus sp.</i> Periderm; wood fragment (14 mm <sup>2</sup> )                                                                                                                                                       | 1.1 mg       |                             |
| BE-20929.1.1 | 508.7             | 10155                             | 56                | 11494                             | 11330-11654   | 11830             | 262.5  | graphite    | several <i>Pinus sp.</i> periderm fragments (90 mm <sup>2</sup> ); <i>Betula alba</i> fruit; 2 conif. ( <i>P. cembra</i> ) basis of male blossom; 4 conif. scale fragments                                           | 1.6 mg       |                             |
| BE-21037.1.1 | 514               | 10214                             | 115               | 11912                             | 11624-12431   | 12261             | 448.5  | gas         | <i>Pinus sp.</i> periderm thin fragments (10 mm <sup>2</sup> )                                                                                                                                                       | 0.4 mg       |                             |
| LST          | 520.2             |                                   |                   | 13006                             | 12997-13015   | 13062             | 55     | TEPHRA      | Reinig et al., 2021                                                                                                                                                                                                  | -            |                             |
| BE-21036.1.1 | 525.4             | 11398                             | 130               | 13282                             | 13165-13408   | 13405             | 183.5  | gas         | <i>Pinus sylvestris</i> type short shoot with two needle fragments (basis)                                                                                                                                           | 0.3 mg       |                             |
| PIN_67.6     | 527.7             |                                   |                   | 13753                             | 13584-13922   | 13689             | 309    | BIOSTRAT    | Amman et al., 2013                                                                                                                                                                                                   | -            |                             |
| BE-20930.1.1 | 527.7             | 11508                             | 134               | 13378                             | 13242-13496   | 13689             | 309    | gas         | 11 <i>Betula alba</i> fruits (partly with wings)                                                                                                                                                                     | 0.4 mg       |                             |
| BE-20931.1.1 | 532.7             | 12280                             | 123               | 14331                             | 14057-14800   | 14212             | 270.5  | gas         | 4 <i>Betula alba</i> fruit fragments; few small dicot leaf fragments                                                                                                                                                 | 0.1mg        |                             |
| BET_75.5     | 535.2             |                                   |                   | 14443                             | 14254-14632   | 14461             | 291.5  | BIOSTRAT    | Amman et al., 2013                                                                                                                                                                                                   | -            |                             |
| BE-20932.1.1 | 537.7             | 12282                             | 283               | 14418                             | 13877-14907   | 14675             | 312.5  | gas         | 1 <i>Betula alba</i> fruit fragment (without wings)                                                                                                                                                                  | 0.1mg        |                             |
| JUN_78.5     | 538.2             |                                   |                   | 14665                             | 14476-14854   | 14711             | 339.5  | BIOSTRAT    | Amman et al., 2013                                                                                                                                                                                                   | -            |                             |
| BE-20933.1.1 | 542.7             | 12573                             | 145               | 14849                             | 14481-15183   | 14989             | 405.5  | gas         | Conif. deciduous twig with periderm; conif. deciduous small fragments (3 mm <sup>2</sup> )                                                                                                                           | 0.6 mg       |                             |
| BET_88.5     | 548.2             |                                   |                   | 16000                             | 15315-16685   | 15575             | 804    | BIOSTRAT    | Rey et al., 2020                                                                                                                                                                                                     | -            |                             |
| BE-20934.1.1 | 560.7             | 9555                              | 302               | 10886                             | 10413-11251   | 16680             | 1305.5 | gas         | Conif. <i>Pinus sp.</i> Periderm (0.5 mm <sup>2</sup> )                                                                                                                                                              | <0.1mg       | outlier                     |

**Table S2:** Parameters used for RABD index calculations.

| <b>Name</b>         | <b>Pigment</b>       | <b>Left band<br/>(nm)</b> | <b>Max. absorption<br/>(nm)</b> | <b>Right band<br/>(nm)</b> |
|---------------------|----------------------|---------------------------|---------------------------------|----------------------------|
| Rmean               | Reflectance          | 471                       |                                 | 950                        |
| RABD <sub>844</sub> | Bphe <i>a</i>        | 772                       | 844                             | 900                        |
| RABD <sub>619</sub> | Phycocyanin          | 570                       | 619                             | 634                        |
| RABD <sub>667</sub> | Chlorophyll <i>a</i> | 634                       | 667                             | 772                        |

**Table S3:** Table with pigments and their primary producers and interpretation, retention times and calibration parameters. Ward's clustering on carotenoids yielded 4 carotenoid groups (Fig. 6 main text) which were subdivided into subgroups based on the primary producer interpretations.

| Carotenoid groups | Pigment name                  | Retention time (Lami et al., 2000)             | Calibration ( $y = ax + b$ ) | Primary producers*                                             |
|-------------------|-------------------------------|------------------------------------------------|------------------------------|----------------------------------------------------------------|
| 1                 | Okenone                       | 46.3                                           | $a = 0.1500$ $b = 0.000$     | PSB                                                            |
| 1                 | Spheroidene                   | 47.2                                           | $\beta$ -car                 | PNSB <sup>2</sup> , N-fixing                                   |
| 1                 | unknown                       | 45.0, 45.6                                     | $\beta$ -car                 |                                                                |
| 2.1               | Isorenieratene                | 51.9                                           | $a = 0.1740$ $b = 0.0350$    | GSB, streptomycetaceae, mycobacteria <sup>1</sup>              |
| 2.1               | OH-spheroidene                | 43.5                                           | $\beta$ -car                 | PNSB <sup>2</sup> , N-fixing                                   |
| 2.1               | unknown                       | 40.2, 48.2, 49.6, 56.4                         | $\beta$ -car                 |                                                                |
| 2.2               | Diatoxanthin                  | 34                                             | $\beta$ -car                 | Diatoms, Silicifiers                                           |
| 2.2               | unknown                       | 23.7, 24.6, 25.1                               | $\beta$ -car                 |                                                                |
| 3.1               | Chloroxanthin                 | 52.6                                           | $\beta$ -car                 | PNSB <sup>2</sup> , N-fixing                                   |
| 3.1               | $\alpha$ -carotene            | 57.5                                           | $\beta$ -car                 |                                                                |
| 3.1               | unknown                       | 47.9                                           | $\beta$ -car                 |                                                                |
| 3.2               | Diadinoxanthin                | 31.8                                           | $a = 0.1363$ $b = 0.0171$    | Dinoflagellates, diatoms, green algae                          |
| 3.2               | $\beta$ -carotene             | 57.3                                           | $a = 0.1294$ $b = 0.0177$    | All aquatic primary producers                                  |
| 3.2               | Lutein, Zeaxanthin            | 27.4, 26.6                                     | $a = 0.1220$ $b = 0.0950$    | Euglenids, green algae, eustigmataceae                         |
| 3.2               | unknown                       | 16.8, 22.3, 35.6, 35.9, 37.1                   | $\beta$ -car                 |                                                                |
| 4.1               | Astaxanthin                   | 19.6                                           | $\beta$ -car                 | Stressed green algae <sup>3</sup>                              |
| 4.1               | Astacene                      | 28.9                                           | $\beta$ -car                 |                                                                |
| 4.1               | unknown                       | 19.2                                           | $\beta$ -car                 |                                                                |
| 4.2               | Canthaxanthin                 | 36.1                                           | $a = 0.1187$ $b = 0.0249$    | Filamentous cyanobacteria, N-fixing                            |
| 4.2               | Alloxanthin                   | 23.2                                           | $a = 0.0904$ $b = 0.1147$    | Cryptophytes, Silicifiers                                      |
| 4.2               | $\gamma$ -carotene            | 56.9                                           | $\beta$ -car                 |                                                                |
| 4.2               | unknown                       | 21.2, 21.8, 37.6, 43.0, 56.2, 61.9, 63.0, 34.4 | $\beta$ -car                 |                                                                |
| 4.3               | Echinenone                    | 49                                             | $a = 0.3000$ $b = 0.0480$    | Cyanobacteria                                                  |
| 4.3               | unknown                       | 51.4, 53, 59.8                                 | $\beta$ -car                 |                                                                |
|                   | Chlorophyll <i>a</i>          | 49.2, 50.2, 50.8                               | $a = 0.2582$ $b = -0.0008$   | Green primary producers                                        |
|                   | Pheophorbides <i>a</i>        | All greens between 10.8 - 49.6                 | chl <i>a</i>                 | Chl <i>a</i> degradation by grazing <sup>4</sup> (Zooplankton) |
|                   | Pheophytins <i>a</i>          | All greens between 51.8 - 59.9                 | chl <i>a</i>                 | Chl <i>a</i> degradation by light and oxygenation              |
|                   | Pyropheophytin <i>a</i>       | All greens between 60.5 - 64.8                 | chl <i>a</i>                 | Heavy chl <i>a</i> degradation (e.g. terrestrial inwash)       |
|                   | Bacteriopheophytin <i>a</i>   | 50.5, 51.1, 53.3                               | $\beta$ -car                 | PSB                                                            |
|                   | Bacteriopheophorbide <i>a</i> | 9.4, 13.1                                      | $\beta$ -car                 | PSB                                                            |

\* Based on classification schemes of Yabuzaki (2017); Bianchi and Canuel (2011); Schlüter et al. (2006); Lami et al. (2000).

<sup>1</sup> Mycobacteria abundance in many freshwater ecosystems and pigment production is proven (Becerril et al., 2018; Vaerewijck et al., 2005; Joynson, 1979; David, 1974).

<sup>2</sup> Albrecht et al., (1997); Davies et al. (1969).

<sup>3</sup> Orosa et al. (2001); Boussiba and Vonshak (1991); Renstrøm et al. (1981)

<sup>4</sup> Bianchi and Canuel (2011)

**Figure S1:** Core segments, stratigraphic correlation and composite core of Amsoldingensee (coring August 2022)

AMS22-COMP1

S.J. Schouten  
21-10-2024

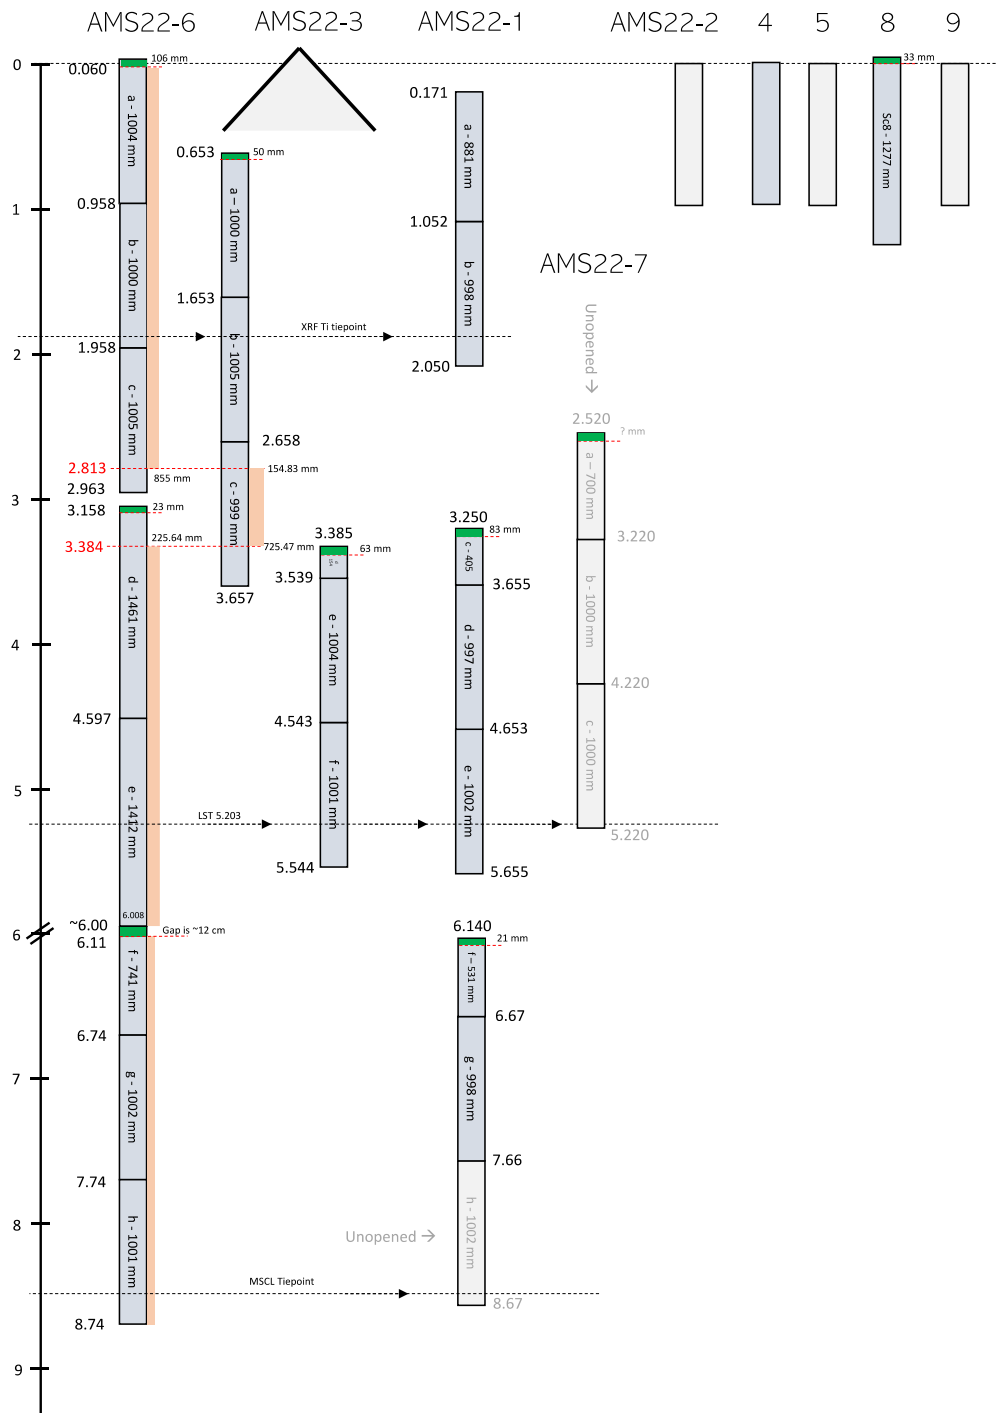

**Figure S2:** Calibration of RABD844 (inferred from hyperspectral imaging) to Bphe a measured with UV-VIS (spectrophotometry) after pigment extraction (proxy-proxy calibration, Butz et al., 2015). Fig. S2 (left) shows the regression with 95% confidence (dashed line) and prediction intervals (dotted line) and the calibration statistics (n, p-values,  $R^2_{adj}$ , RMSEP for 10-fold jackknifing, k-fold jackknifing, and bootstrapped); the orange horizontal dashed line represents the Limit of Quantification. The panels in the middle show the Q-Q plot, Cook's Distance, the time series comparison, the residual distribution and (right panels) the scale-location, residual trajectory and leverage plots.

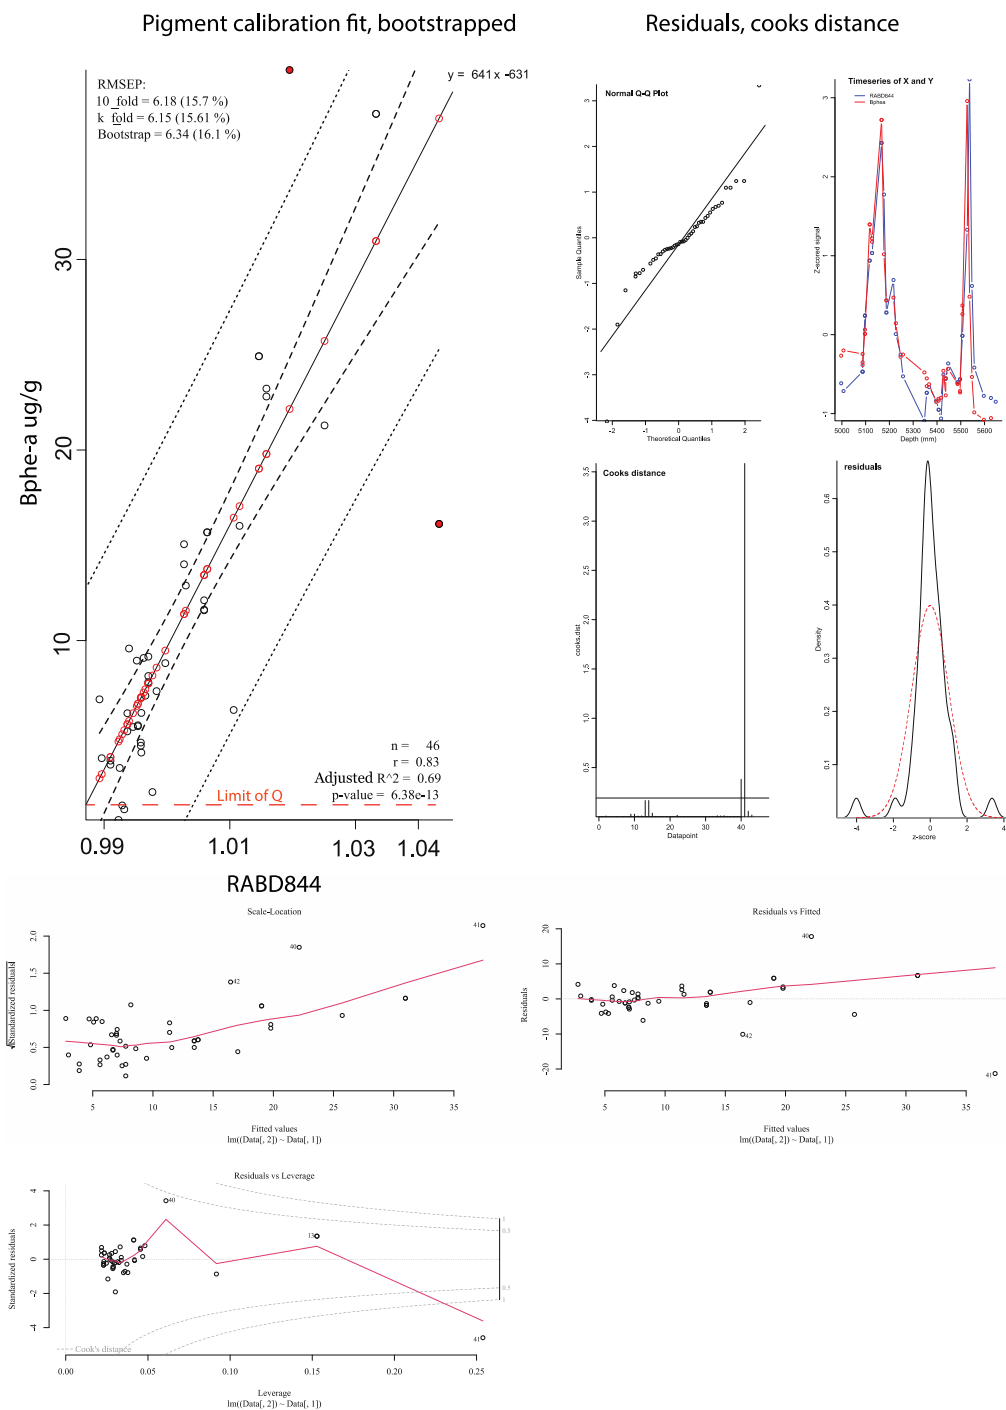

**Figure S3:** Calibration of RABD667 (inferred from hyperspectral imaging) to chl *a* measured with UV-VIS (spectrophotometry) after pigment extraction (proxy-proxy calibration, Butz et al., 2015). Fig. S3 (left) shows the regression with 95% confidence (dashed line) and prediction intervals (dotted line) and the calibration statistics (n, p-values,  $R^2_{adj}$ , RMSEP for 10-fold jackknifing, k-fold jackknifing, and bootstrapped); the orange horizontal dashed line represents the Limit of Quantification. The panels in the middle show the Q-Q plot, Cook's Distance, the time series comparison, the residual distribution and (right panels) the scale-location, residual trajectory and leverage plots.

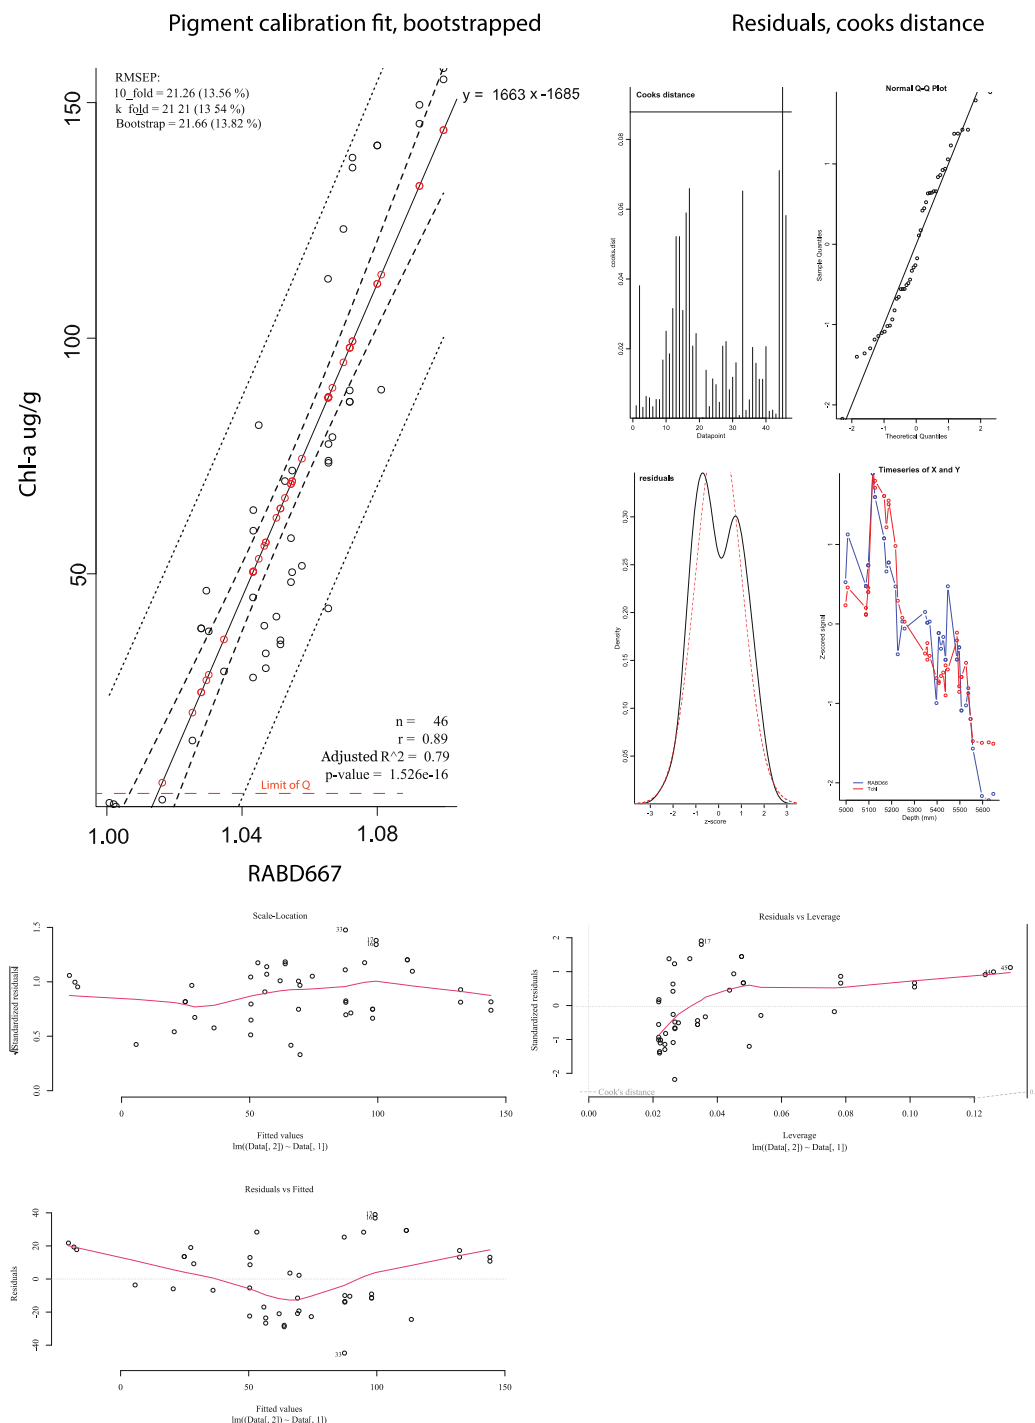





**Figure S5:** All CLR XRF data from core AMS22\_COMP1. A selection is shown in Fig. 3 of the main text.

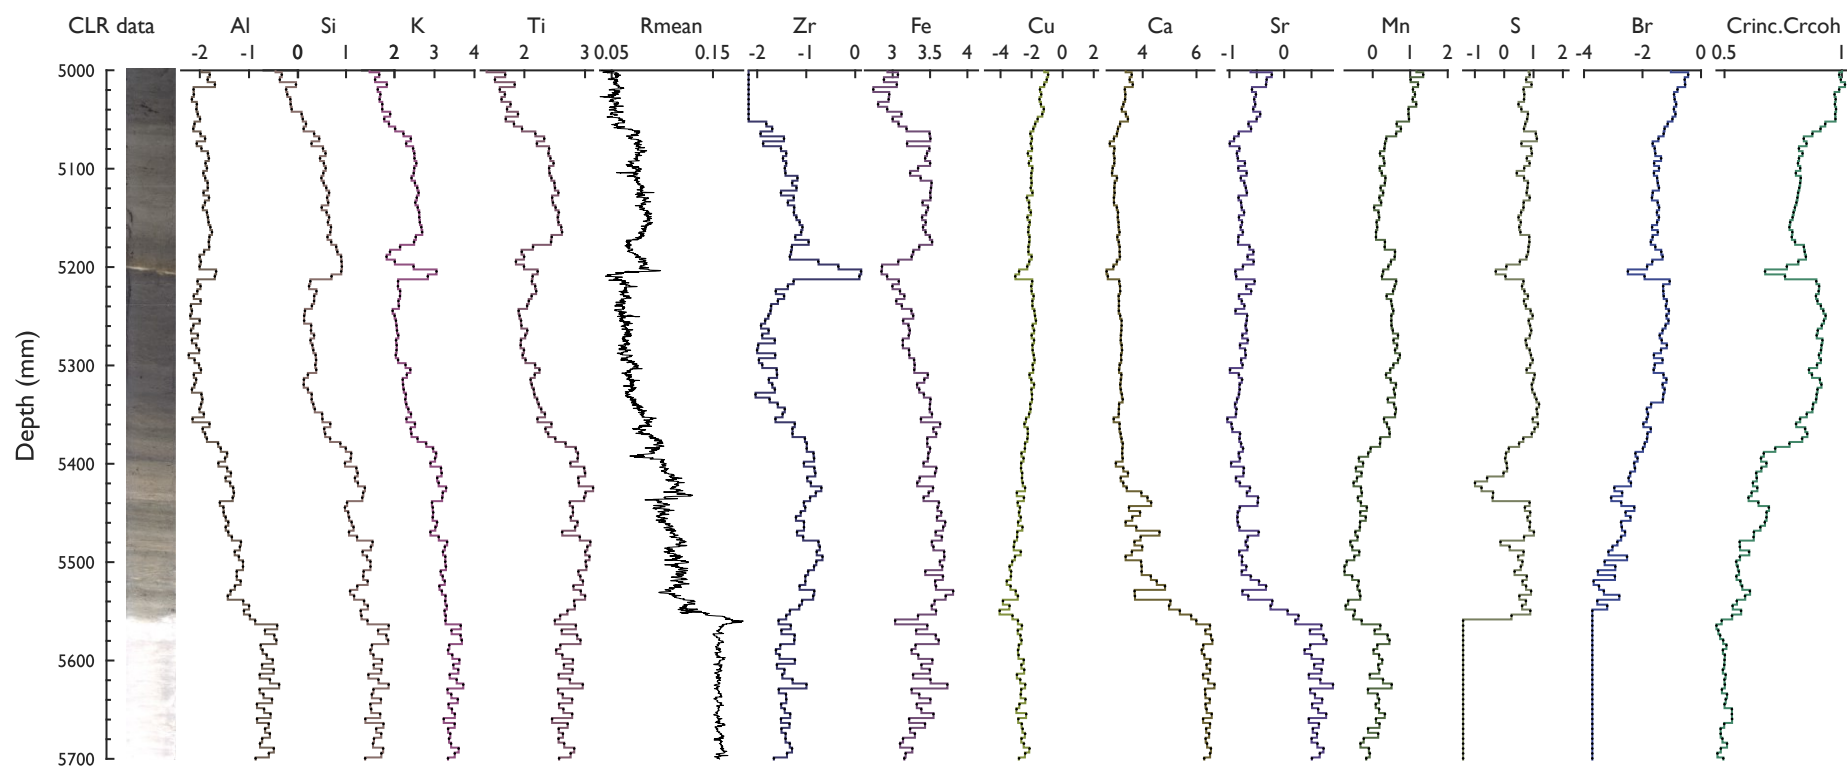

**Figure S6:** 'Standardized' Euclidian multi-dimensional scaling was applied to the dataset to check for non-linear dependencies. Added are the resulting MDS axes and the inferred clusters (lithotypes) that remain well separated when applying MDS. The stress plot is provided with an appropriate cutoff at 0.05 indicating that only two MDS components are needed to explain most data variance.

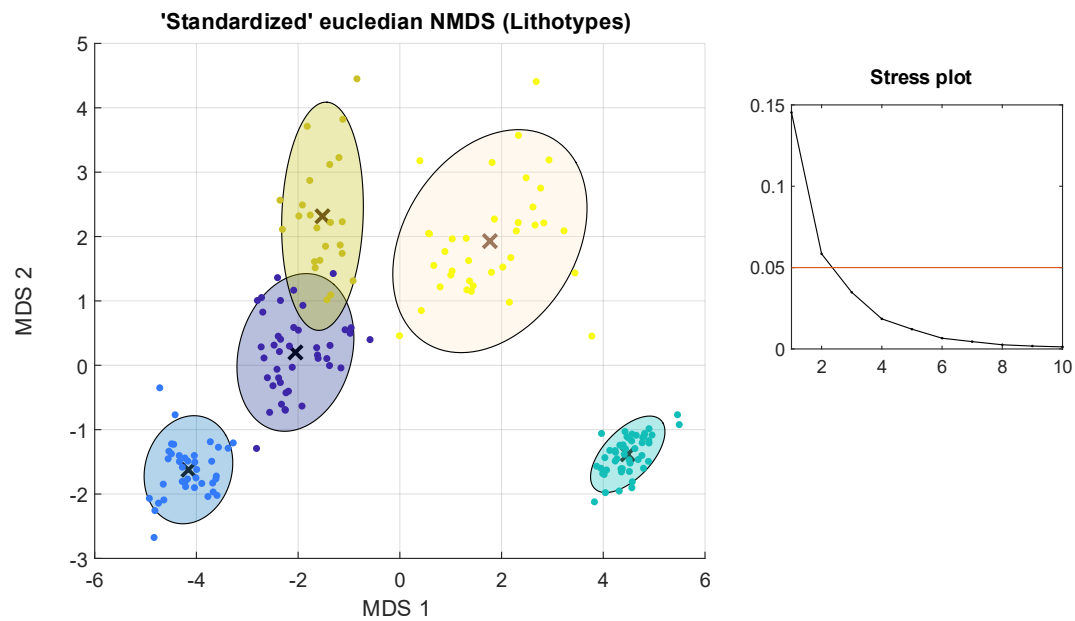

**Figure S7:** PC biplot of P, Mn and Fe fractions (all data). Ward's clusters 1–4 are colored along their confidence ellipses. Arrows indicate the temporal trajectory (ages in green). The environmental interpretation of the PCs is indicated in blue text.

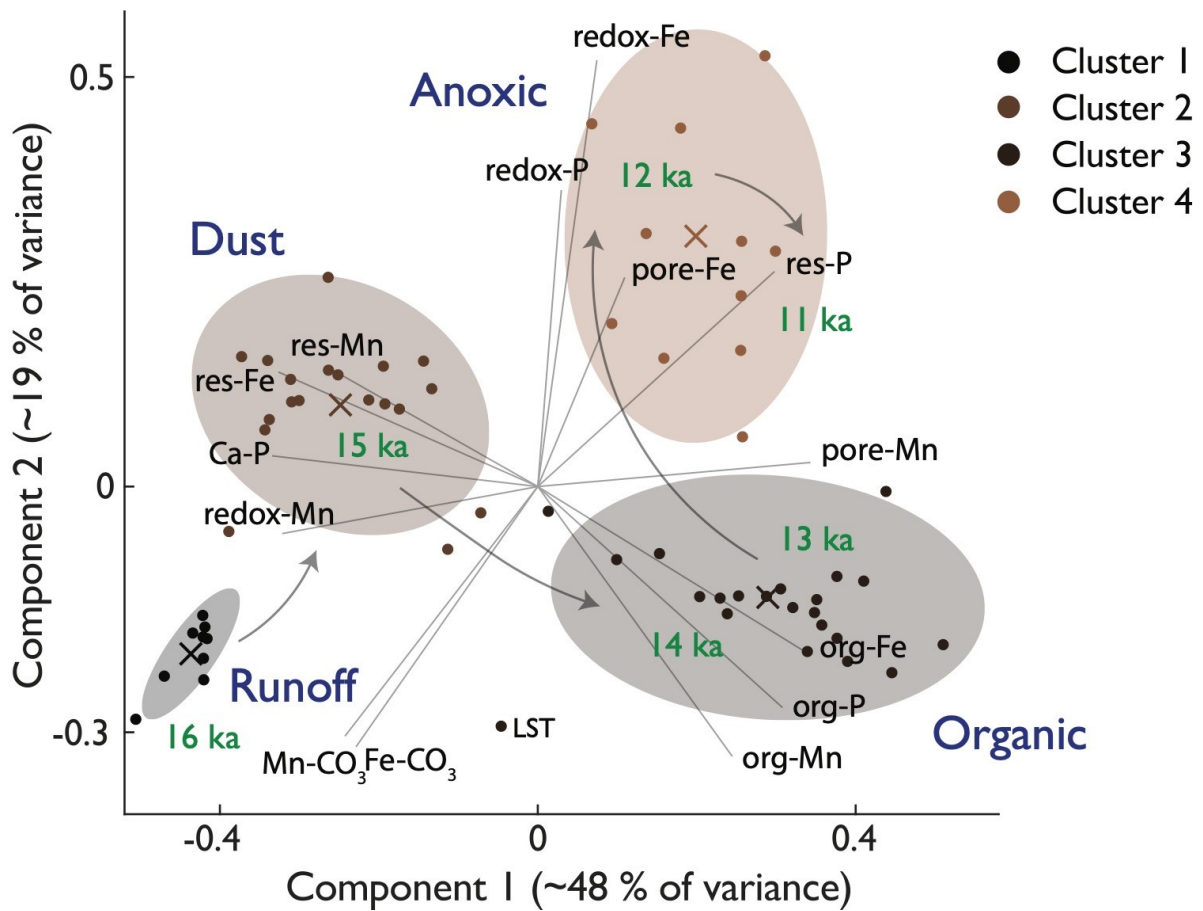

**Figure S8:** Pigment stratigraphy for a) carotenoids and b) photopigments of lake Amsoldingen (AMS22-COMP1)

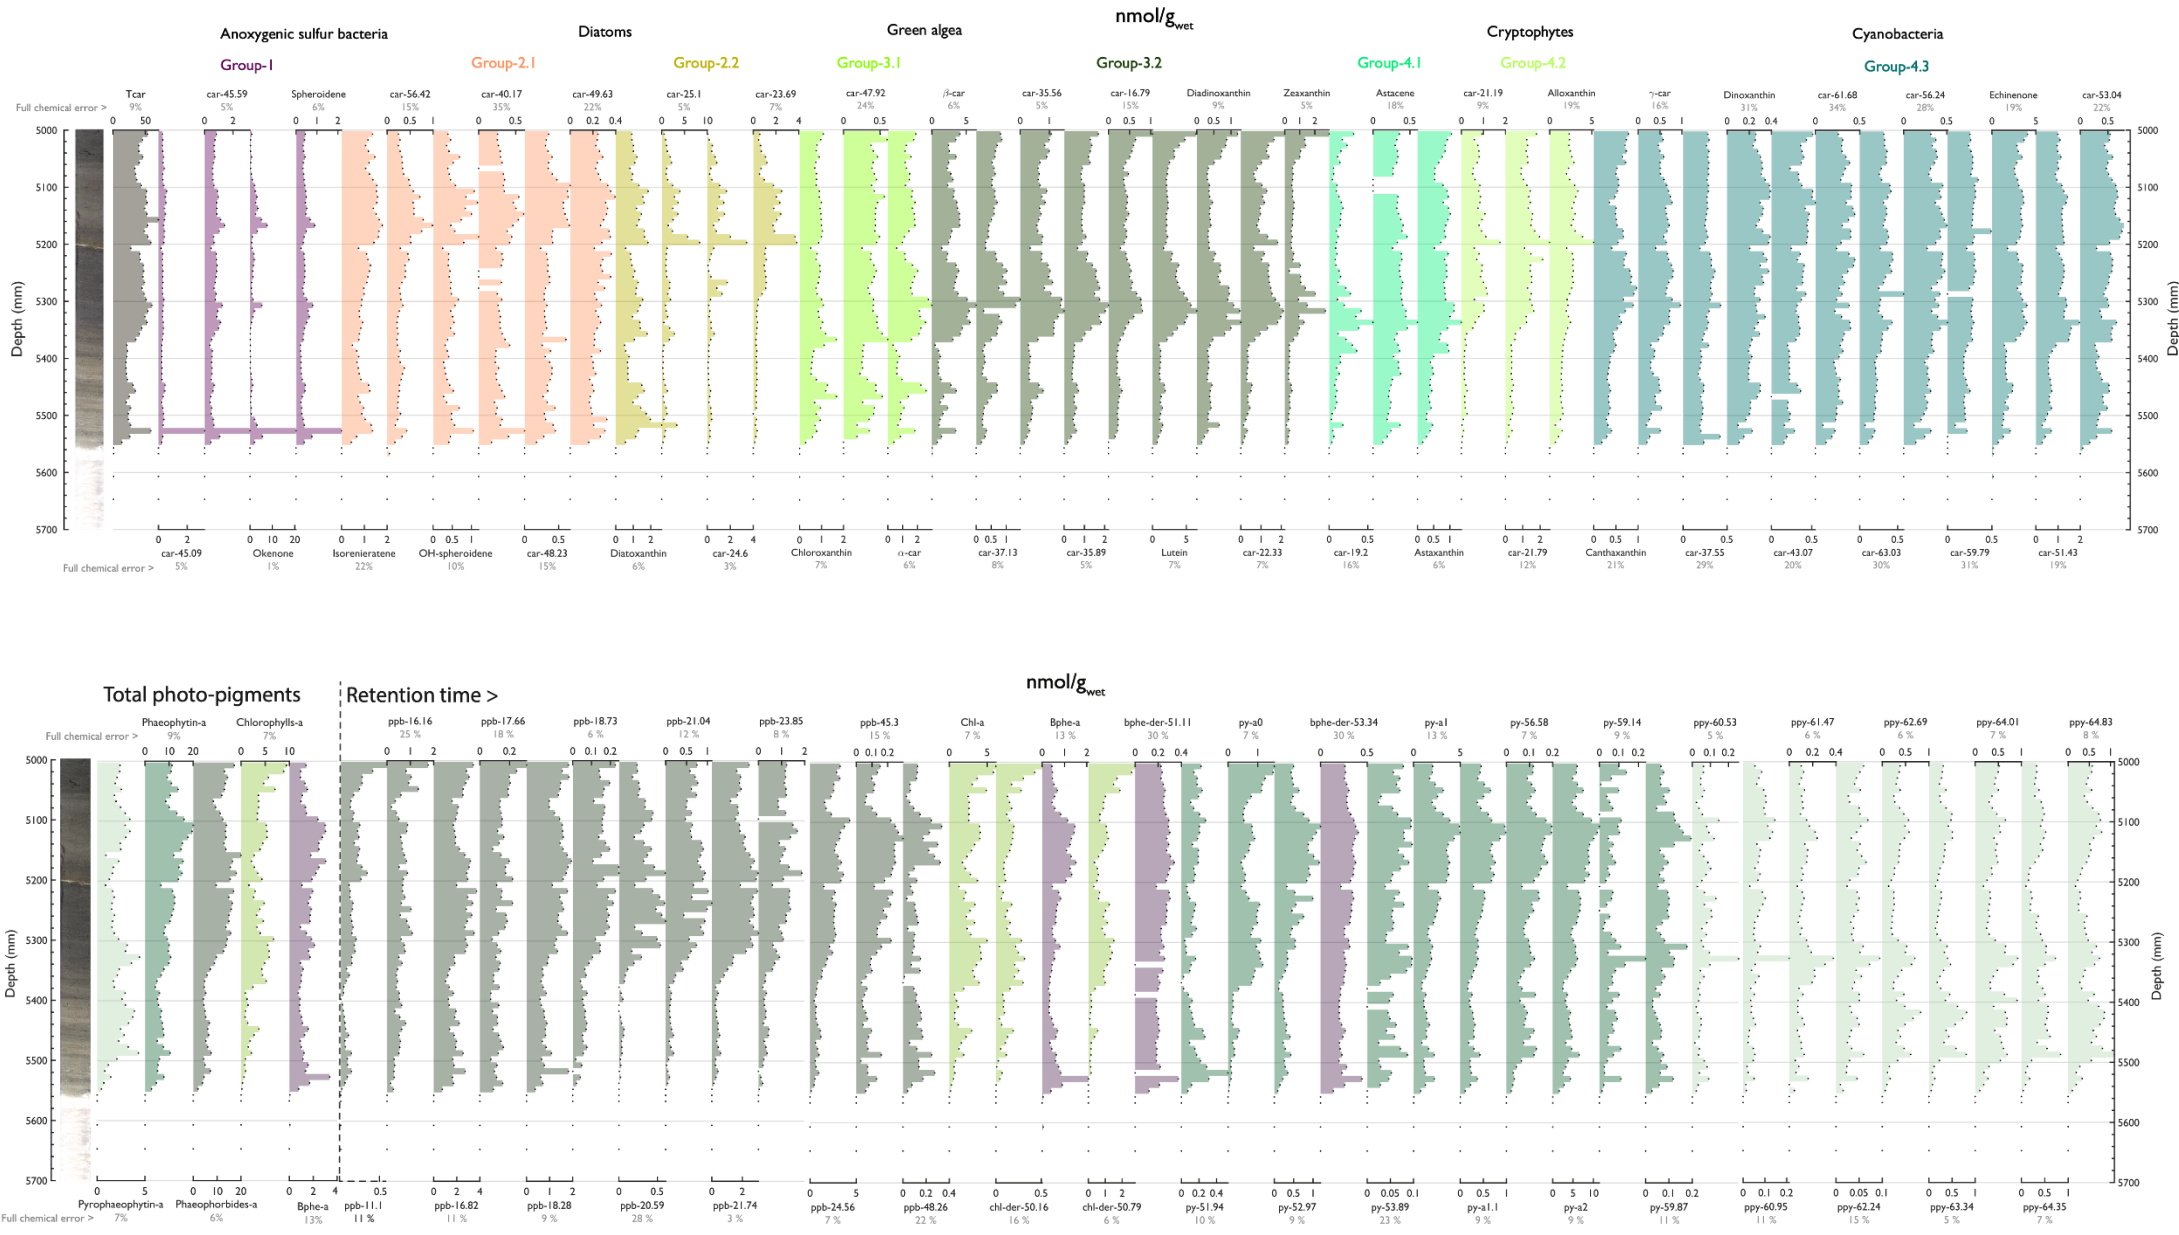

**Figure S9.** Redundancy analysis was performed on the Hellinger transform of the carotenoid dataset and total sums of pheophorbides, pheophytins, pyropheophytins and chlorophylls *a*. The RDA was first run (**A**) using the following explanatory variables: JulyT (merged by overlaying data from Bolland et al., 2020 and the Alpine stack from Heiri et al., 2015; pre 14.8 ka BP from Bürgaschisee, post 14.8 ka BP from Alpine stack. We further smoothed the data using the 'rloess' method with a span of 2% for the alpine stack and 20% for the Bürgaschisee data; Arboreal Pollen AP from Moossee (Rey et al., 2020);  $\delta^{18}\text{O}$  of NGRIP (NGRIP Members, 2004), Bphe *a* (this study) and TN, TS, TOC and CNS (this study). The variance partitioning between nutrients and temperature is shown panel **B**. A second RDA (panel **C**) and was performed after forward selection (Legendre, 2012).

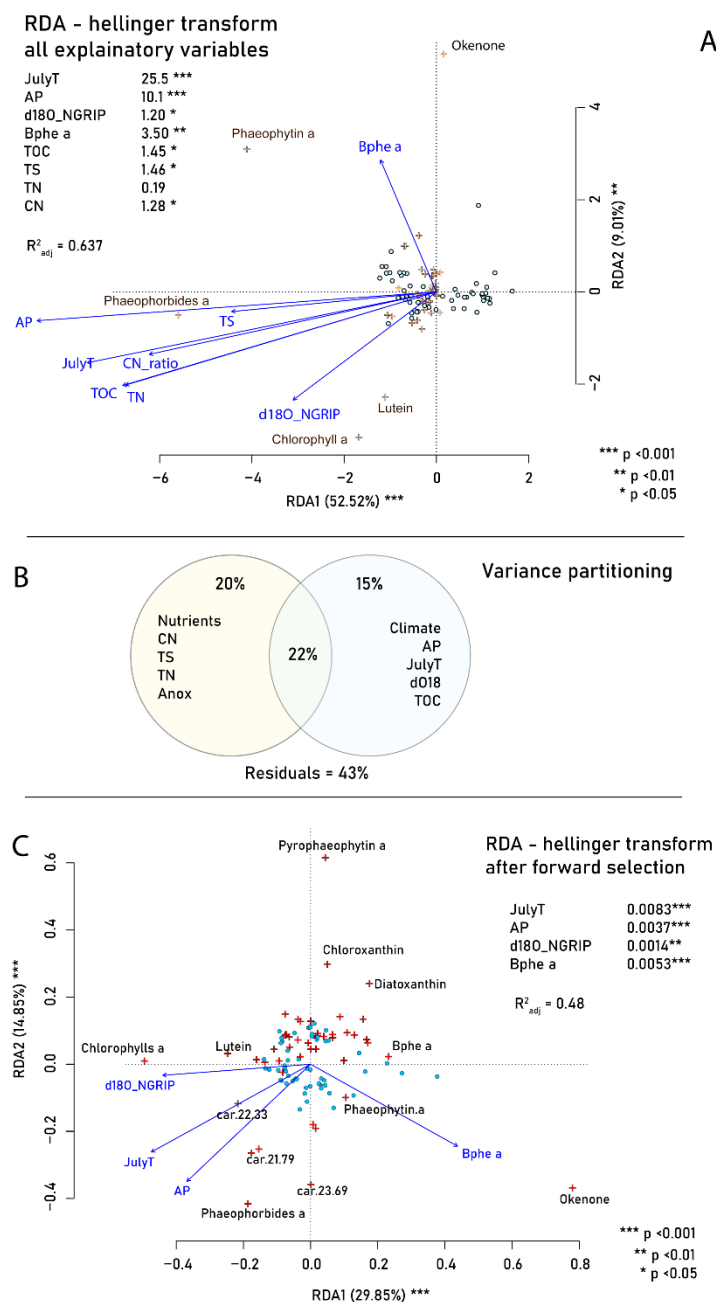

**Figure S10.** PC1 versus PC2 loadings for all extracted pigments. Only the identified pigments are named.

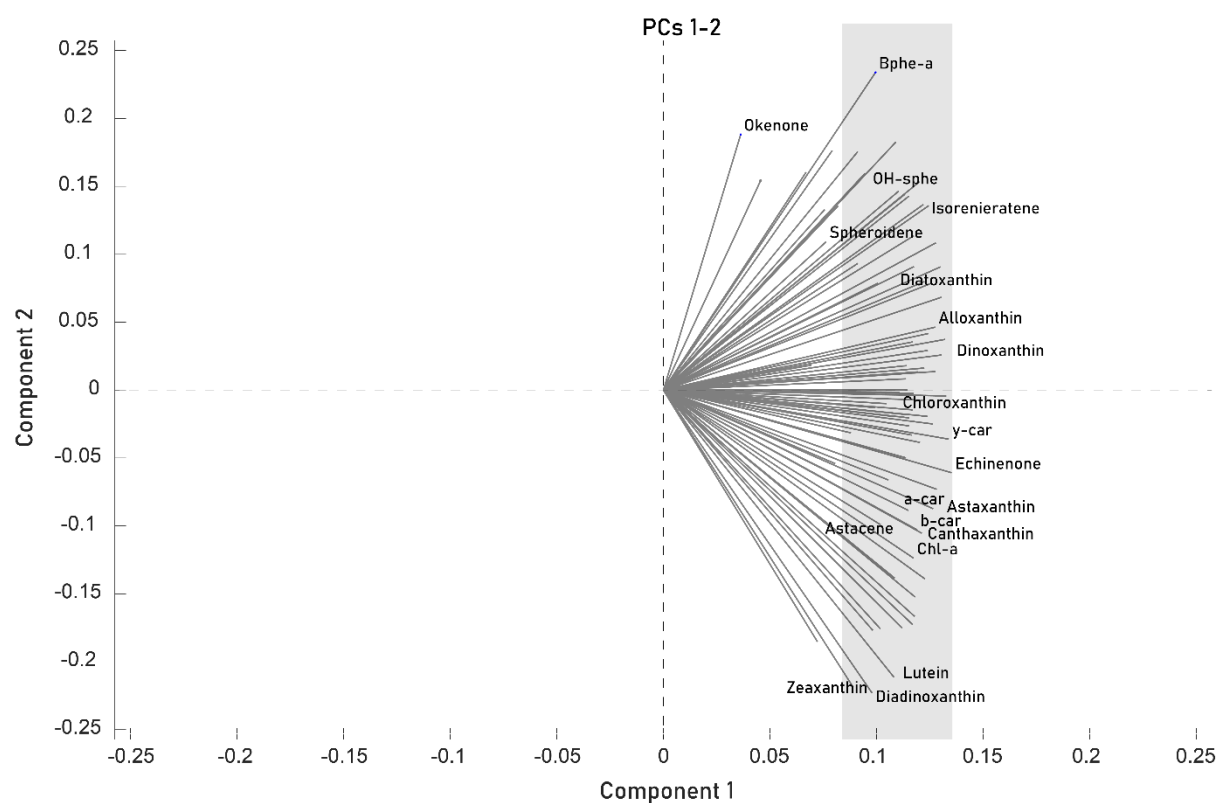

## References (SOM)

- Albrecht, M., Ruther, A., Sandmann, G. (1997). Purification and biochemical characterisation of a hydroxyneurosporene desaturase involved in the biosynthetic pathway of the carotenoid spheroidene in *Rhodobacter sphaeroides*. *Journal of Bacteriology*, 179(23), 7462-7467, 10.1128/jb.179.23.7462-7467.1997, 1997.
- Ammann, B., van Leeuwen, J. F., van der Knaap, W. O., Lischke, H., Heiri, O., Tinner, W.: Vegetation responses to rapid warming and to minor climatic fluctuations during the Late-Glacial Interstadial (GI-1) at Gerzensee (Switzerland). *Palaeogeography, Palaeoclimatology, Palaeoecology*, 391, 40–59, 10.1016/j.palaeo.2012.07.010, 2013.
- Becerril, A., Álvarez, S., Braña, A. F., Rico, S., Díaz, M., Santamaría, R. I., Salas, J. A., Méndez, C.: Uncovering production of specialised metabolites by *Streptomyces argillaceus*: Activation of cryptic biosynthesis gene clusters using nutritional and genetic approaches. *PLoS One*, 13(5), e0198145, 10.1371/journal.pone.0198145, 2018.
- Bianchi, T. S., and Canuel, E. A.: Photosynthetic Pigments: Chlorophylls, Carotenoids, and Phycobilins in: *Chemical Biomarkers in Aquatic Ecosystems*, edited by: Bianchi, T. S., Canuel, E.A., 221-247, Princeton University Press, <https://doi.org/10.1515/9781400839100>, 2011
- Bolland, A., Rey, F., Gobet, E., Tinner, W., and Heiri, O.: Summer temperature development 18,000–14,000 cal. BP recorded by a new chironomid record from Burgäschisee, Swiss Plateau. *Quaternary Science Reviews*, 243, 106484, 10.1016/j.quascirev.2020.106484, 2020.
- Boussiba, S., Vonshak, A.: Astaxanthin accumulation in the green alga *Haematococcus pluvialis*. *Plant and cell Physiology*, 32, 1077–1082, 10.1093/oxfordjournals.pcp.a078171, 1991.
- Butz, C., Grosjean, M., Fischer, D., Wunderle, S., Tylmann, W., Rein, B.: Hyperspectral imaging spectroscopy: a promising method for the biogeochemical analysis of lake sediments. *Journal of Applied Remote Sensing*, 9, 096031, 10.1117/1.JRS.9.096031, 2015.
- David, H. L.: Carotenoid pigments of *Mycobacterium kansasii*. *Applied Microbiology*, 28(4), 696-699, <https://doi.org/10.1128/am.28.4.696-699.1974>, 1974.
- Davies, B. H., Holmes, E. A., Loeber, D. E., Toubé, T. P., Weedon, B. C. L.: Carotenoids and related compounds. Part XXIII. Occurrence of 7, 8, 11, 12-tetrahydrolycopene, spheroidene, 3, 4, 11', 12'-tetrahydrospheroidene, and 11', 12'-dihydrospheroidene in *Rhodospirillum rubrum*. *Journal of the Chemical Society C: Organic*, (9), 1266-1268, <https://doi.org/10.1039/J39690001266>, 1969.
- Heiri, O., Ilyashuk, B., Millet, L., Samartin, S., Lotter, A. F.: Stacking of discontinuous regional palaeoclimate records: Chironomid-based summer temperatures from the Alpine region. *The Holocene*, 25, 137–149, 10.1177/0959683614556382, 2015.
- Joynson, D. H. M.: Water: The natural habitat of *Mycobacterium Kansasii*? *Tubercle*, 60(2), 77-81, [https://doi.org/10.1016/0041-3879\(79\)90039-4](https://doi.org/10.1016/0041-3879(79)90039-4), 1979.
- Lami, A., Guilizzoni, P., Marchetto, A.: High resolution analysis of fossil pigments, carbon, nitrogen and sulphur in the sediment of eight European Alpine lakes: The MOLAR project. *Journal of Limnology*, 59, 15–28, 10.4081/jlimnol.2000.s1.15, 2000.
- Legendre, P.: *Numerical ecology*. Elsevier, 10.1016/b978-0-12-409548-9.10595-0, 2012.
- Moore, P. D., Webb, J. A., Collison, M. E.: Pollen analysis. (Vol. 80). *JSTOR*, 10.2307/2260877, 1991.
- North Greenland Ice Core Project members.: High-resolution record of Northern Hemisphere climate extending into the last interglacial period. *Nature*, 431, 147–151, 10.1038/nature02805, 2004.



- Orosa, M., Valero, J. F., Herrero, C., Abalde, J.: Comparison of the accumulation of astaxanthin in *Haematococcus pluvialis* and other green microalgae under N-starvation and high light conditions. *Biotechnology Letters*, 23, 1079–1085, <https://doi.org/10.1023/A:1010510508384>, 2001.
- Renstrøm, B., Borch, G., Skulberg, O. M., Liaaen-Jensen, S.: Optical purity of (3S, 3'S)-astaxanthin from *Haematococcus pluvialis*. *Phytochemistry*, 20(11), 2561–2564, [https://doi.org/10.1016/0031-9422\(81\)83094-4](https://doi.org/10.1016/0031-9422(81)83094-4), 1981.
- Rey, F., Gobet, E., Schwörer, C., Hafner, A., Szidat, S., Tinner, W.: Climate impacts on vegetation and fire dynamics since the last deglaciation at Moossee (Switzerland). *Climate of the Past*, 16, 1347–1367, 10.5194/cp-16-1347-2020, 2020.
- Rey, F., Gobet, E., van Leeuwen, J. F., Gilli, A., van Raden, U. J., Hafner, A., Othmar, W., Rhiner, J., Schmock, D., Zünd, J., Tinner, W.: Vegetational and agricultural dynamics at Burgäschisee (Swiss Plateau) recorded for 18,700 years by multi-proxy evidence from partly varved sediments. *Vegetation History and Archaeobotany*, 26, 571–586, 10.1007/s00334-017-0635-x, 2017.
- Schlüter, L., Lauridsen, T. L., Krogh, G., Jørgensen, T.: Identification and quantification of phytoplankton groups in lakes using new pigment ratios—a comparison between pigment analysis by HPLC and microscopy. *Freshwater Biology*, 51, 1474–1485, 10.1111/j.1365-2427.2006.01582.x, 2006.
- Vaerewijck, M. J., Huys, G., Palomino, J. C., Swings, J., Portaels, F.: Mycobacteria in drinking water distribution systems: ecology and significance for human health. *FEMS Microbiology Reviews*, 29(5), 911–934, 10.1016/j.femsre.2005.02.001, 2005.
- Wehrli, M., Tinner, W., Ammann, B.: 16,000 years of vegetation and settlement history from Egelsee (Menzingen, central Switzerland). *The Holocene*, 17, 747–761, 10.1177/0959683607080515, 2007.
- Yabuzaki, J.: Carotenoids Database: structures, chemical fingerprints and distribution among organisms. Database, bax004 [data base], 10.1093/database/bax004, 2017.
